# Supplementary material
Source: HighWire-hosted journal article supplement (http://ajnr-stage2.highwire.org/highwire/filestream/96692/field_highwire_adjunct_files/0/0769.pdf)
Supplement: 0769.pdf [file 0769.pdf]

**Online Table 1: Clinical data of patients with AE.**

| Case no. | Age/Sex | Clinical presentation                                     | EEG                                                                                                                                                                | CSF                                                                           | Symptom duration (Days) | Treatment                                           | Diagnosis <sup>#</sup>  |
|----------|---------|-----------------------------------------------------------|--------------------------------------------------------------------------------------------------------------------------------------------------------------------|-------------------------------------------------------------------------------|-------------------------|-----------------------------------------------------|-------------------------|
| 1        | 62/M    | Recurrent convulsions                                     | Normal                                                                                                                                                             | Normal                                                                        | 35                      | IVIG and steroids                                   | Anti-LGI 1 encephalitis |
| 2        | 44/F    | Memory deterioration, rave, arms and legs twitch          | Severe abnormalities ( $\delta$ wave activity, and partially mixed with $\theta$ waves over prefrontal, frontal and central leads) without epileptiform discharges | Elevated total cell counts, elevated total leucocytes, and decreased chloride | 65                      | IVIG, steroids and antiepileptic drugs              | Anti-LGI 1 encephalitis |
| 3        | 61/M    | Memory deterioration, and paroxysmal convulsion           | Normal                                                                                                                                                             | Elevated glucose and protein, and decreased chloride                          | 60                      | IVIG, antiepileptic drugs and symptomatic treatment | Anti-LGI 1 encephalitis |
| 4        | 67/F    | Headache, memory deterioration, and paroxysmal convulsion | Severe abnormalities ( $\delta$ wave activity, and partially mixed with $\theta$ waves over each lead) without                                                     | Elevated total cell counts, elevated protein, and decreased chloride          | 84                      | Steroids, immunosuppressive agents and              | Anti-LGI 1 encephalitis |

|   |      |                                                                                           |                                                                                                                                                     |                                                           |    |                                      |                          |
|---|------|-------------------------------------------------------------------------------------------|-----------------------------------------------------------------------------------------------------------------------------------------------------|-----------------------------------------------------------|----|--------------------------------------|--------------------------|
|   |      |                                                                                           | epileptiform discharges                                                                                                                             |                                                           |    | antiepileptic drugs                  |                          |
| 5 | 68/F | Memory deterioration                                                                      | Normal                                                                                                                                              | Normal                                                    | 30 | IVIG and steroids                    | Anti-LGI 1 encephalitis  |
| 6 | 51/M | Headache, discontinuity convulsion, slow response, psychiatric disorder, walking unstable | Slow wave activity in left frontotemporal                                                                                                           | Elevated total cell counts, total leucocytes and proteins | 90 | Chemotherapy and antiepileptic drugs | Anti-GABAbR encephalitis |
| 7 | 47/M | Headache, convulsion and unconsciousness, memory deterioration                            | Severe abnormalities ( $\delta$ wave activity, and partially mixed with $\theta$ waves in the left hemisphere) without epileptiform discharges      | Elevated total cell counts and total leucocytes           | 18 | IVIG, steroids and plasma exchange   | Anti-GABAbR encephalitis |
| 8 | 35/M | Headache, dysphasia, bad right hand movement, and amorphous type                          | Mild abnormalities ( $\alpha$ rhythm irregular and increased $\beta$ activity in the bilateral frontotemporal lead) without epileptiform discharges | Elevated total cell counts, total leucocytes and proteins | 20 | Steroids and antiepileptic drugs     | Anti-NMDAR encephalitis  |

|   |      |                                                                       |                            |                                                 |    |                                                                 |                         |
|---|------|-----------------------------------------------------------------------|----------------------------|-------------------------------------------------|----|-----------------------------------------------------------------|-------------------------|
| 9 | 29/M | Paroxysmal<br>binocular skew,<br>unconsciousness,<br>speech disorders | Diffuse slow wave activity | Elevated<br>leucocytes and<br>decreased glucose | 42 | IVIG,<br>immunosuppre<br>ssive agents<br>and plasma<br>exchange | Anti-NMDAR encephalitis |
|---|------|-----------------------------------------------------------------------|----------------------------|-------------------------------------------------|----|-----------------------------------------------------------------|-------------------------|

**Note:** -AE, autoimmune encephalitis; Anti-NMDAR, anti-N-methyl-D-aspartic acid receptor; Anti-LGI 1, anti-leucine rich, glioma-inactivated 1; anti-GABAbR, Anti-gamma-aminobutyric acid b receptor; EEG, electroencephalogram; CSF, cerebrospinal fluid; IVIG, intravenous immunoglobulin.

# Finally diagnosed by autoantibody assay testing from patients' blood serum and cerebrospinal fluid.

**Online Table 2: Conventional MRI characteristics and 3D pCASL features of 9 patients with AE.**

| Case No. | Lesion location     | T1WI                                   | T2WI                                   | T2 FLAIR                                | Contrast enhancement    | Perfusion                                 |
|----------|---------------------|----------------------------------------|----------------------------------------|-----------------------------------------|-------------------------|-------------------------------------------|
| 1        | R. HT               | →                                      | →                                      | ↑                                       | NA                      | ↑↑                                        |
| 2        | Bil. H              | ↓                                      | ↑                                      | ↑↑                                      | None                    | ↑↑ (R); ↑ (L)                             |
| 3        | Bil. H              | →                                      | →                                      | ↑ (R); → (L)                            | None                    | ↑↑ (R); ↑ (L)                             |
| 4        | Bil. H              | ↓                                      | ↑                                      | ↑↑ (R); ↑ (L)                           | None                    | ↑↑ (R); ↑ (L)                             |
| 5        | Bil. H              | →                                      | →                                      | → (R); ↑ (L)                            | None                    | ↑ (R); ↑↑ (L)                             |
| 6        | L. H                | ↓                                      | ↑                                      | ↑                                       | Mild patchy enhancement | ↑↑                                        |
| 7        | Bil. H <sup>★</sup> | → (First);<br>↓ (Second);<br>↓ (Third) | → (First);<br>↑ (Second);<br>↑ (Third) | → (First);<br>↑↑ (Second);<br>↑ (Third) | None                    | NA (First);<br>↑↑(Second) ;<br>↓↓ (Third) |
| 8        | L. FPTI             | →                                      | ↑                                      | ↑                                       | None                    | ↑                                         |
| 9        | L. FT               | ↓                                      | ↑                                      | ↑                                       | None                    | ↑↑                                        |

**Note:** -R =right, L = left, Bil = bilateral, F = frontal lobe, T = temporal lobe, H = hippocampus, P = parietal lobe, I = insula lobe; NA = not applicable; T1WI = T1-weighted imaging; T2WI = T2-weighted imaging; T2 FLAIR = T2 fluid-attenuated inversion recovery; ↑ = mildly increased signal/perfusion; ↑↑ = markedly increased signal/perfusion; ↓ = mildly decreased signal; ↓↓ = markedly decreased perfusion; → = Isointensity.

<sup>★</sup> Conventional MRI was normal and 3D pCASL was not performed on the first MRI examination.

**Online Table 3: The CBF and rCBF values of the lesions with AE and the healthy controls (mean  $\pm$  SD).**

| Location              |      | AE Group          | Control group    | P value |
|-----------------------|------|-------------------|------------------|---------|
| Hippocampus           | CBF  | 89.6 $\pm$ 22.28  | 43.1 $\pm$ 5.47  | < 0.001 |
|                       | rCBF | 2.28 $\pm$ 0.61   | 1.10 $\pm$ 0.15  | < 0.001 |
| Temporal lobe         | CBF  | 73.7 $\pm$ 8.32   | 50.1 $\pm$ 5.45  | < 0.05  |
|                       | rCBF | 2.44 $\pm$ 0.47   | 1.28 $\pm$ 0.14  | < 0.05  |
| Insula lobe           | CBF  | 56.9              | 50.18 $\pm$ 6.99 | NA      |
|                       | rCBF | 2.17              | 1.27 $\pm$ 0.17  | NA      |
| Frontal lobe          | CBF  | 61.25 $\pm$ 13.08 | 52.81 $\pm$ 4.03 | NA      |
|                       | rCBF | 2.12 $\pm$ 0.79   | 1.34 $\pm$ 0.14  | NA      |
| Cerebellar hemisphere | CBF  | 37.14 $\pm$ 6.98  | 39.16 $\pm$ 2.51 | > 0.05  |

**Note:** -NA, not applicable; CBF, cerebral blood flow; rCBF, relative CBF; Unit of CBF was ml/100 g/min.

**Online Table 4: Perfusion features of patients with AE in the literature.**

| References                                     | Methods                               | Type of AE                                        | Type of manuscript<br>(No. of patients) | Findings                                                                                                                                 |
|------------------------------------------------|---------------------------------------|---------------------------------------------------|-----------------------------------------|------------------------------------------------------------------------------------------------------------------------------------------|
| (Llorens et al 2010) <sup>9</sup>              | Tc-99m HMPAO<br>SPECT                 | Anti-NMDAR<br>encephalitis                        | Letter to the Editor (one<br>patient)   | Multiple focal regions of increased radiotracer uptake in<br>frontal basal-limbic region                                                 |
| (Sachs et al 2017) <sup>6</sup>                | ASL                                   | Anti-NMDAR<br>encephalitis                        | Case report (one patient)               | Focally increased CBF in the right temporoparietal region<br>before laboratory diagnosis and MRI abnormalities                           |
| (Vallabhaneni et al 2018) <sup>8</sup>         | CTP                                   | Anti-GAD65<br>encephalitis                        | Case report (one patient)               | Focally increased CBF and CBV in the left parietooccipital<br>region                                                                     |
| (Lapucci et al 2019) <sup>36</sup>             | ASL and <sup>18</sup> F-FDG<br>PET/CT | Anti-NMDAR<br>encephalitis                        | Letter to the Editor (one<br>patient)   | ASL and <sup>18</sup> F-FDG showed bilateral occipito-parietal<br>hypoperfusion/hypometabolism                                           |
| (Li et al 2019) <sup>37</sup>                  | ASL and <sup>18</sup> F-FDG<br>PET/CT | Anti-LGI 1<br>encephalitis                        | Case report (one patient)               | ASL and <sup>18</sup> F-FDG PET showed no abnormal<br>perfusion/metabolism in the bilateral hippocampus                                  |
| (Dinoto et al 2021) <sup>12</sup>              | ASL and <sup>18</sup> F-FDG<br>PET/CT | Anti-LGI 1<br>encephalitis and<br>seronegative LE | Brief communication (two<br>patients)   | ASL and <sup>18</sup> F-FDG PET/CT are strongly concordant in limbic<br>encephalitis (LE)                                                |
| (Espinosa-Jovel C et al<br>2016) <sup>30</sup> | ASL and <sup>18</sup> F-FDG<br>PET/CT | Anti-LGI 1<br>encephalitis                        | Case report (one patient)               | Hyperperfusion/hypermetabolism could be related to an<br>autonomic focal status epilepticus rather than the LGI-1<br>encephalitis itself |

**Note:** -Tc-99m HMPAO SPECT, technetium-99m hexamethyl propylene amine oxime SPECT;  $^{18}\text{F}$ -FDG PET/CT,  $^{18}\text{F}$ -fluoro-2-deoxy-glucose PET/CT; ASL, arterial spin labeling; CTP, computed tomography perfusion; ASL, arterial spin labeling; Anti-NMDAR, anti-N-methyl-D-aspartic acid receptor; Anti-LGI 1, anti-leucine rich, glioma-inactivated 1; Anti-GAD65, anti-glutamate decarboxylase 65; CBF, cerebral blood flow; CBV, cerebral blood volume.

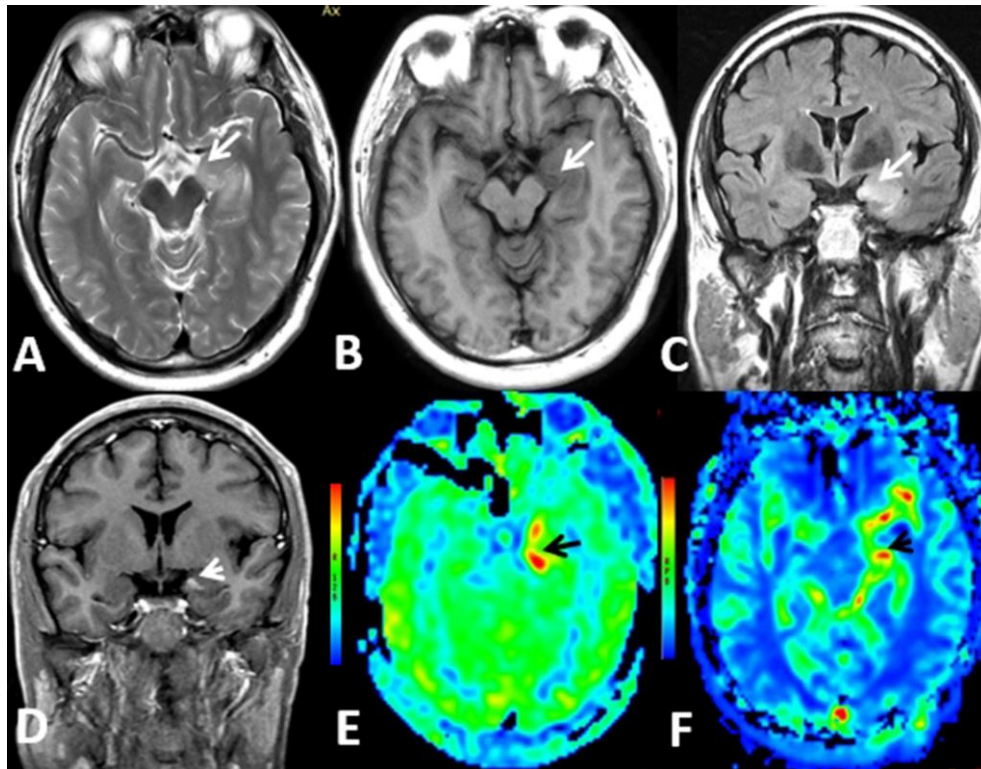

**Online FIG 1:** MR imaging of Case 6. (A) Axial T2WI and (C) Coronal T2 FLAIR showed swelling and hyperintensities in the left hippocampus (white arrows), with hypointensities on axial T1WI (B) (white arrow). (D) Coronal postcontrast T1WI revealed mild patchy enhancement (white arrowhead). (E) 3D pCASL and (F) dynamic susceptibility-weighted contrast-enhanced imaging (DSC) showed marked hyperperfusion in the corresponding region (black arrow and arrowhead, respectively).
